# Supplementary material
Source: Springer Nature journal article supplement (https://www.springermedizin.de/resource/supplementary/13054_2011_515_MOESM2_ESM.pdf/9708712)

# Time course of Corrected Colonization Index

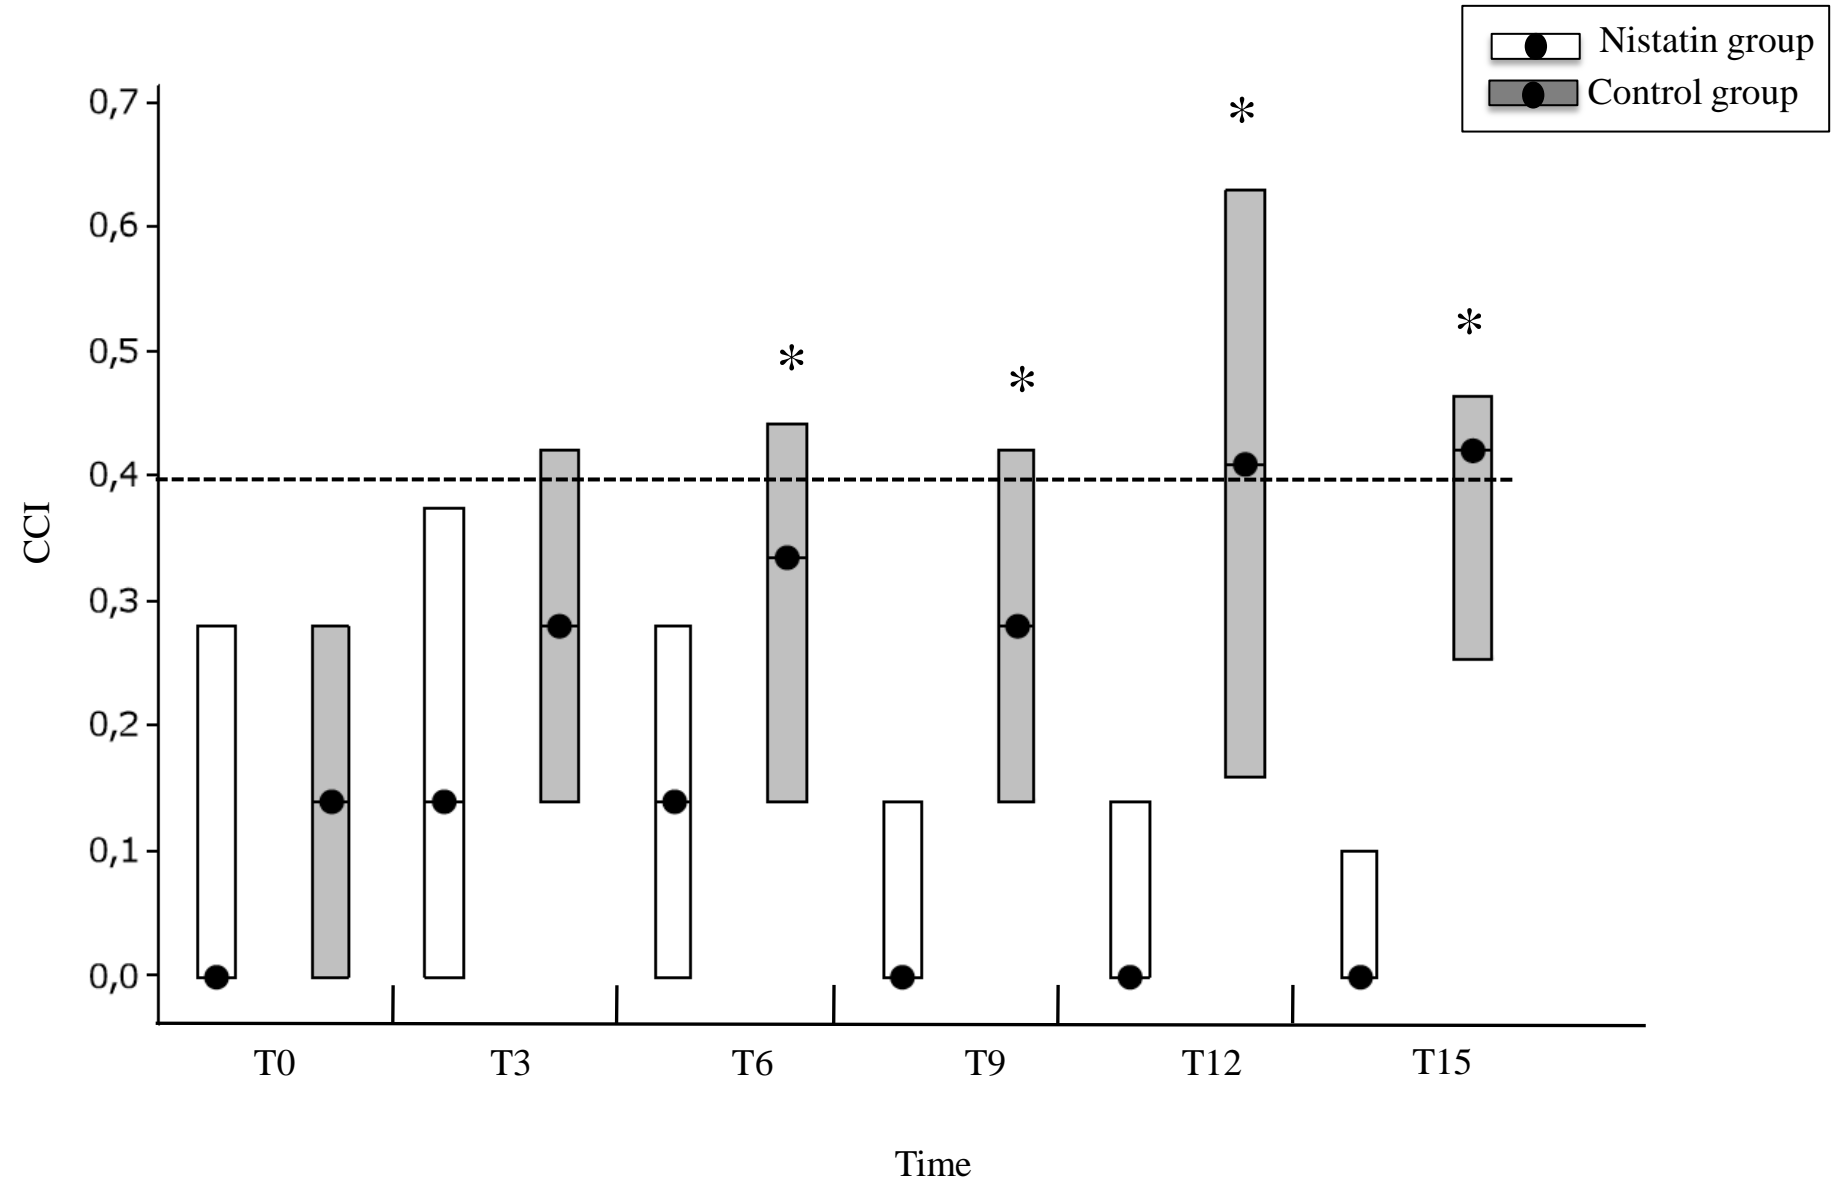

Supplement: MOESM2 [file 9708712]
